# Supplementary material
Source: PubMed Central journal article supplement (PMC9437135)
Supplement: NIHMS1816012-supplement-supplemental_tables_and_references.pdf [file NIHMS1816012-supplement-supplemental_tables_and_references.pdf]

**Supplemental Table 1: JS-MKS gene candidates and suspect gene-condition associations**

| <b>Gene</b>    | <b>Reported condition</b> | <b>Rationale</b>                                                                                                                                                            | <b>Ref</b> |
|----------------|---------------------------|-----------------------------------------------------------------------------------------------------------------------------------------------------------------------------|------------|
| <i>ADAMTS9</i> | JS                        | **Strong candidate with only two families identified so far                                                                                                                 | (36, 126)  |
| <i>CBY1</i>    | JS                        | **Strong candidate with only two families identified so far                                                                                                                 | (54)       |
| <i>CELSR2</i>  | JS                        | only one family in each of two papers, specific variants not reported in one paper, biallelic variants in a well-established JS gene ( <i>TOGARAM1</i> ) in the other paper | (165, 193) |
| <i>CEP164</i>  | JS                        | only one family with JS, variants reported in families with other ciliopathies                                                                                              | (27, 193)  |
| <i>CLUAP1</i>  | JS                        | only one family with JS                                                                                                                                                     | (92)       |
| <i>EXOC2</i>   | JS                        | only single family with MTS (2 families reported w/MRIs of 3 peps)                                                                                                          | (188)      |
| <i>EXOC4</i>   | MKS                       | only single families with JS or MKS                                                                                                                                         | (160)      |
| <i>EXOC8</i>   | JS                        | only single family with JS                                                                                                                                                  | (49)       |
| <i>KIF14</i>   | MKS                       | single family with MKS                                                                                                                                                      | (60)       |
| <i>POC1B</i>   | JS                        | only one family with JS                                                                                                                                                     | (16)       |
| <i>TTC21B</i>  | JS                        | no biallelic variants in JS, biallelic variants reported in families with other ciliopathies                                                                                | (46)       |
| <i>ZNF423</i>  | JS                        | only one family with possible JS, variants reported in families with NPH                                                                                                    | (27)       |

**Supplemental Table 2: Common Hh signaling phenotypes in JS-MKS-NPH models**

| Human gene                                                    | Localization |      |      |        | Western blot |      | mRNA     |          |          | in situ |      | Neural tube | Polydactyly |
|---------------------------------------------------------------|--------------|------|------|--------|--------------|------|----------|----------|----------|---------|------|-------------|-------------|
|                                                               | SMO          | GLI2 | GLI3 | GPR161 | GLI2         | GLI3 | GLI1     | PTCH     | SHH      | PTCH    | GLI1 |             |             |
| <i>ADAMST9</i> (36, 129)                                      | AB           | ND   | ND   | ND     | ND           | AB   | AB       | AB       | ND       | ND      | ND   | ND          | ND          |
| <i>AHI1</i> (128)                                             | NL           | ND   | ND   | ND     | ND           | ND   | AB       | NL       | ND       | ND      | ND   | ND          | ND          |
| <i>ARL13B</i> - KO/null (25, 56, 66, 101, 110, 124, 131, 173) | AB<br>NL     | NL   | AB   | AB     | ND           | NL   | AB<br>NL | AB       | AB       | ND      | ND   | AB          | AB          |
| <i>ARL13B</i> - KD (15, 66, 124)                              | AB           | NL   | AB   | ND     | ND           | ND   | AB       | AB<br>NL | ND       | ND      | ND   | ND          | ND          |
| <i>ARL3</i> (97, 156)                                         | AB           | ND   | AB   | ND     | ND           | AB   | ND       | ND       | ND       | ND      | ND   | ND          | ND          |
| <i>ARMC9</i> (19)                                             | NL           | AB   | AB   | ND     | ND           | ND   | ND       | ND       | ND       | ND      | ND   | ND          | ND          |
| <i>B9D1</i> (35, 50)                                          | AB           | ND   | ND   | ND     | ND           | AB   | AB       | AB       | ND       | ND      | ND   | AB          | AB          |
| <i>B9D2</i> (50)                                              | ND           | ND   | ND   | ND     | ND           | ND   | ND       | ND       | ND       | ND      | ND   | ND          | AB          |
| <i>C2CD3</i> (20, 28, 81)                                     | ND           | ND   | ND   | ND     | AB           | AB   | ND       | AB       | AB       | AB      | AB   | AB          | AB          |
| <i>CC2D2A</i> (35, 64, 191)                                   | AB           | ND   | ND   | ND     | ND           | ND   | ND       | ND       | ND       | ND      | ND   | AB          | AB          |
| <i>CEP104</i> (63, 205)                                       | AB           | ND   | ND   | AB     | ND           | ND   | AB       | ND       | ND       | ND      | ND   | ND          | ND          |
| <i>CEP164</i> (95)                                            | ND           | AB   | ND   | ND     | ND           | ND   | ND       | ND       | ND       | ND      | ND   | ND          | ND          |
| <i>CEP290</i> - KD (87, 93, 166, 169)                         | AB<br>NL     | AB   | AB   | ND     | ND           | AB   | AB<br>NL | AB       | AB       | ND      | ND   | ND          | ND          |
| <i>CPLANE1</i> (7)                                            | ND           | ND   | ND   | ND     | ND           | ND   | AB       | AB       | ND       | ND      | ND   | ND          | ND          |
| <i>CSPP1</i> (63, 164)                                        | AB           | ND   | ND   | ND     | ND           | ND   | AB       | ND       | ND       | ND      | ND   | ND          | ND          |
| <i>DCDC2</i> (125)                                            | ND           | ND   | ND   | ND     | ND           | ND   | ND       | ND       | AB<br>NL | ND      | ND   | ND          | ND          |
| <i>FAM149B1</i> (162)                                         | ND           | ND   | ND   | ND     | ND           | ND   | AB       | AB       | ND       | ND      | ND   | ND          | AB          |
| <i>HYLS1</i> (30)                                             | ND           | ND   | AB   | AB     | ND           | ND   | AB       | AB       | ND       | ND      | ND   | ND          | ND          |
| <i>IFT172</i> (62, 67, 70, 85, 86, 132, 133)                  | AB           | ND   | ND   | ND     | ND           | AB   | AB       | ND       | ND       | AB      | AB   | AB          | AB          |

|                                                                             |          |          |          |    |          |          |          |          |    |    |    |    |        |        |
|-----------------------------------------------------------------------------|----------|----------|----------|----|----------|----------|----------|----------|----|----|----|----|--------|--------|
| <i>INPP5E-KO/null</i> (29, 38, 52, 65)                                      | AB<br>NL | AB       | AB       | AB | AB       | AB       | AB       | AB       | AB | ND | ND | ND | A<br>B | A<br>B |
| <i>KIAA0586</i> (4, 13, 14, 44, 45)                                         | ND       | ND       | ND       | ND | AB       | AB       | AB       | AB       | AB | ND | AB | AB | A<br>B | A<br>B |
| <i>KIAA0753</i> (88)                                                        | ND       | ND       | ND       | ND | ND       | ND       | AB       | AB       | AB | AB | ND | ND | N<br>D | N<br>D |
| <i>KIF7-KO/null</i> (33, 53, 83, 103, 111, 117, 142, 210)                   | NL       | AB       | AB       | ND | AB       | AB       | AB<br>NL | AB       | AB | ND | ND | AB | A<br>B | A<br>B |
| <i>KIF7-KD</i> (7, 76, 113, 143, 156, 178, 179, 207)                        | NL       | AB<br>NL | AB<br>NL | ND | AB       | AB       | NL       | AB<br>NL | AB | ND | AB | ND | A<br>B | A<br>B |
| <i>MKS1</i> (23, 40, 67, 199)                                               | AB       | ND       | ND       | AB | ND       | ND       | ND       | ND       | ND | ND | AB | AB | A<br>B | A<br>B |
| <i>OFD1</i> (41)                                                            | ND       | ND       | ND       | ND | ND       | AB       | AB       | AB       | AB | AB | ND | ND | N<br>D | N<br>D |
| <i>RPGRIP1L</i> (31, 192, 197)                                              | AB       | ND       | ND       | ND | ND       | AB       | AB       | AB       | AB | ND | AB | ND | A<br>B | A<br>B |
| <i>SUFU-KO/null</i> (1, 32, 78, 79, 109, 114, 123, 130, 140, 175, 204, 206) | ND       | AB       | AB       | AB | AB       | AB<br>NL | AB<br>NL | AB       | AB | AB | AB | AB | A<br>B | A<br>B |
| <i>SUFU-KD</i> (47, 79, 94, 109, 123, 154, 176, 210)                        | AB       | ND       | ND       | ND | AB<br>NL | AB<br>NL | AB<br>NL | AB<br>NL | NL | AB | ND | ND | A<br>B | A<br>B |
| <i>TCTN1</i> (64)                                                           | AB       | ND       | ND       | ND | ND       | AB       | ND       | ND       | ND | ND | AB | AB | N<br>D | A<br>B |
| <i>TCTN2</i> (64, 150, 161, 200)                                            | AB       | ND       | ND       | ND | ND       | AB       | AB       | AB       | AB | ND | ND | ND | A<br>B | A<br>B |
| <i>TCTN3</i> (181, 196)                                                     | AB       | ND       | ND       | ND | AB       | AB       | AB       | AB       | AB | ND | ND | ND | A<br>B | A<br>B |
| <i>TMEM67-KO/null</i> (2, 64)                                               | NL       | ND       | ND       | ND | ND       | ND       | ND       | ND       | ND | AB | ND | ND | A<br>B | N<br>D |
| <i>TMEM67-KD</i> (106)                                                      | ND       | ND       | ND       | ND | ND       | ND       | NL       | NL       | ND | NL | AB | ND | N<br>D | N<br>D |
| <i>TMEM107</i> (158)                                                        | ND       | ND       | ND       | ND | ND       | ND       | AB       | ND       | ND | ND | AB | AB | A<br>B | A<br>B |
| <i>TMEM216</i> (187)                                                        | ND       | ND       | ND       | ND | ND       | ND       | ND       | ND       | ND | ND | ND | ND | N<br>D | A<br>B |
| <i>TMEM231</i> (35)                                                         | AB       | ND       | ND       | ND | ND       | ND       | AB       | ND       | ND | ND | ND | ND | A<br>B | A<br>B |

|                                     |    |    |    |    |    |    |    |    |    |    |    |        |        |
|-------------------------------------|----|----|----|----|----|----|----|----|----|----|----|--------|--------|
| <i>TTC21B</i><br>(184, 185,<br>198) | NL | ND | ND | ND | ND | AB | AB | NL | ND | AB | ND | A<br>B | N<br>D |
| <i>TOGARAM1</i><br>(102)            | AB | ND | N<br>D | N<br>D |
| <i>WDR19</i> (8,<br>112)            | NL | AB | ND | ND | ND | NL | AB | AB | ND | AB | ND | A<br>B | A<br>B |

**Supplemental Table 3: Locus heterogeneity in zebrafish models of JS-associated genes**

| Human Gene                  | ZF GENE<br>ZF mutant                            | Renal cysts | Curved Body<br>axis | Kinked Curved<br>tail | Retinal<br>involvement | Ciliogenesis | Hydrocephalus | Method        |
|-----------------------------|-------------------------------------------------|-------------|---------------------|-----------------------|------------------------|--------------|---------------|---------------|
| <i>AHI1</i> (108)           | <i>ahi1</i><br><i>ahi1<sup>lri46</sup></i>      | AB          | ND                  | AB                    | AB                     | AB           | ND            | TALENs        |
| <i>ARL13B</i> (51, 68, 174) | <i>hi459</i><br><i>scorpion<sup>hi459</sup></i> | AB          | AB                  | AB                    | ND                     | AB           | ND            | Ins Mut       |
| <i>ARMC9</i> (21)           | <i>armc9</i>                                    | AB          | AB                  | ND                    | ND                     | AB           | ND            | CRISPR        |
| <i>B9D2</i> (50)            | <i>b9d2</i>                                     | ND          | ND                  | ND                    | ND                     | ND           | ND            | MO            |
| <i>CC2D2A</i> (69)          | <i>cc2d2a</i><br><i>sentinel</i>                | AB          | AB                  | ND                    | ND                     | ND           | ND            | ENU           |
| <i>CEP41</i> (104)          | <i>cep41</i>                                    | ND          | ND                  | ND                    | ND                     | ND           | ND            | MO            |
| <i>CEP104</i> (63)          | <i>cep104</i>                                   | ND          | ND                  | AB                    | ND                     | ND           | ND            | MO            |
| <i>CEP120</i> (163)         | <i>cep120</i>                                   | AB          | AB                  | ND                    | ND                     | ND           | AB            | MO            |
| <i>CEP290</i> (151, 152)    | <i>cep290/</i><br><i>nphp6</i>                  | AB          | ND                  | ND                    | AB                     | ND           | AB            | MO            |
| <i>CSPP1</i> (186)          | <i>cspp1a/b</i>                                 | AB          | AB                  | ND                    | ND                     | ND           | AB            | MO            |
| <i>IFT172</i> (119)         | <i>ift172</i>                                   | ND          | ND                  | ND                    | ND                     | AB           | ND            | MO            |
| <i>INPP5E</i> (209)         | <i>inpp5e</i>                                   | AB          | ND                  | AB                    | AB                     | AB           | ND            | MO            |
| <i>KIAA0586</i> (17, 134)   | <i>talpid3</i><br><i>ta3<sup>262-1265</sup></i> | AB          | AB                  | ND                    | AB                     | AB           | ND            | ZFN           |
| <i>KIAA0556</i> (148)       | <i>kiaa0556</i>                                 | ND          | ND                  | AB                    | ND                     | ND           | ND            | MO            |
| <i>KIAA0753</i> (74)        | <i>kiaa0753</i><br><i>sa22657</i>               | ND          | AB                  | ND                    | ND                     | ND           | ND            | Comm.<br>EZRC |
| <i>MKS1</i> (107)           | <i>mks1</i>                                     | ND          | ND                  | ND                    | ND                     | ND           | ND            | MO            |
| <i>NPHP1</i> (115)          | <i>nphp1</i>                                    | AB          | ND                  | ND                    | ND                     | ND           | ND            | MO            |
| <i>NPHP4</i> (22)           | <i>nphp4</i>                                    | AB          | ND                  | AB                    | AB                     | ND           | ND            | MO            |
| <i>OFD1</i> (58)            | <i>ofd1</i>                                     | ND          | AB                  | ND                    | ND                     | ND           | AB            | MO            |
| <i>PDE6D</i> (182)          | <i>pde6d</i>                                    | AB          | ND                  | ND                    | AB                     | ND           | ND            | MO            |
| <i>RPGRIP1L</i> (122)       | <i>rpgrip11l,</i><br><i>mks5</i>                | ND          | AB                  | ND                    | ND                     | ND           | AB            | MO            |
| <i>TCTN2</i> (116)          | <i>tctn2</i>                                    | ND          | ND                  | ND                    | ND                     | ND           | ND            | MO            |
| <i>TMEM67</i> (106)         | <i>tmem67,</i><br><i>mks3</i>                   | AB          | ND                  | AB                    | AB                     | ND           | AB            | MO            |
| <i>TMEM138</i> (105)        | <i>tmem138</i>                                  | ND          | AB                  | ND                    | ND                     | ND           | ND            | MO            |
| <i>TMEM216</i> (105)        | <i>tmem216</i>                                  | ND          | AB                  | AB                    | ND                     | ND           | AB            | MO            |
| <i>TMEM237</i> (84)         | <i>tmem237a/b</i>                               | ND          | ND                  | ND                    | ND                     | ND           | ND            | MO            |
| <i>TOGARAM1</i> (21)        | <i>togaram1</i>                                 | AB          | AB                  | ND                    | ND                     | AB           | ND            | CRISPR        |

**Supplemental Table 4: Locus heterogeneity in mouse models of JS-associated genes**

| Human Gene                            | Mouse Gene /mutant                   | Embryonic/<br>perinatal lethality | Eye defects | L-R asymmetry | Disrupted Hh/<br>Neural tube | Polydactyly | Kidney cysts | Ciliogenesis | Cranio-facial<br>defects |
|---------------------------------------|--------------------------------------|-----------------------------------|-------------|---------------|------------------------------|-------------|--------------|--------------|--------------------------|
| <i>AHI1</i> (99, 100)                 | <i>Ahi1</i>                          | ND                                | ND          | ND            | ND                           | ND          | AB           | ND           | ND                       |
| <i>ARL13B</i> (25, 173)               | <i>Arl13b, hennin</i>                | AB                                | AB          | AB            | AB                           | AB          | ND           | AN           | ND                       |
| <i>ARL3</i> (75, 153)                 | <i>Arl3</i>                          | AB                                | AB          | ND            | ND                           | ND          | AB           | ND           | ND                       |
| <i>B9D1</i> (50)                      | <i>B9d1</i>                          | AB                                | AB          | AB            | AB                           | AB          | AB           | AB           | AB                       |
| <i>B9D2</i> (183)                     | <i>B9d2, stumpy</i>                  | ND                                | ND          | ND            | ND                           | ND          | AB           | AB           | ND                       |
| <i>CPLANE1</i><br><i>C5ORF42</i> (43) | <i>Cplane1</i><br><i>hug</i>         | AB                                | AB          | ND            | NL                           | AB          | AB           | AB           | AB                       |
| <i>CC2D2A</i> (64)                    | <i>Cc2d2a</i>                        | ND                                | AB          | AB            | ND                           | ND          | ND           | ND           | ND                       |
| <i>C2CD3</i> (81)                     | <i>C2cd3</i><br><i>hty, hearty</i>   | AB                                | ND          | AB            | AB                           | AB          | ND           | AB           | ND                       |
| <i>CEP41</i> (104)                    | <i>Cep41</i>                         | AB                                | ND          | ND            | ND                           | ND          | ND           | ND           | ND                       |
| <i>CEP120</i> (203)                   | <i>Cep120</i>                        | AB                                | ND          | AB            | AB                           | ND          | ND           | AB           | ND                       |
| <i>CEP290</i> (144)                   | <i>Cep290</i>                        | AB                                | AB          | ND            | ND                           | ND          | AB           | ND           | ND                       |
| <i>CSPP1</i><br>MGI: 2681832          | <i>Cspp1</i>                         | ND                                | ND          | ND            | ND                           | ND          | ND           | ND           | ND                       |
| <i>HYLS1</i><br>MGI: 1924082          | <i>Hyls1</i>                         | AB                                | ND          | AB            | ND                           | ND          | ND           | ND           | ND                       |
| <i>IFT172</i> (70, 86)                | <i>lft172, wim, slb</i>              | AB                                | AB          | AB            | AB                           | AB          | ND           | ND           | AB                       |
| <i>INPP5E</i> (89)                    | <i>Inpp5e</i>                        | AB                                | AB          | ND            | ND                           | AB          | AB           | ND           | AB                       |
| <i>KIAA0586</i> (13, 14)              | <i>Talpid3</i>                       | AB                                | ND          | AB            | AB                           | AB          | ND           | AB           | AB                       |
| <i>KIAA0556</i> (149)                 | <i>Kiaa0556</i>                      | ND                                | ND          | ND            | ND                           | ND          | NL           | NL           | ND                       |
| <i>KIAA0753</i><br>MGI: 1921727       | <i>Kiaa0753</i>                      | AB                                | ND          | AB            | ND                           | ND          | ND           | ND           | AB                       |
| <i>KIF7</i> (113)                     | <i>Kif7, maki</i>                    | AB                                | ND          | ND            | AB                           | AB          | ND           | ND           | ND                       |
| <i>MKS1</i> (40, 199)                 | <i>Mks1</i>                          | AB                                | AB          | AB            | AB                           | AB          | AB           | AB           | AB                       |
| <i>NPHP1</i> (90, 91)                 | <i>Nphp1</i>                         | ND                                | AB          | ND            | ND                           | ND          | NL           | ND           | ND                       |
| <i>NPHP4</i> (202)                    | <i>Nphp4</i><br><i>nmf192</i>        | ND                                | AB          | ND            | ND                           | ND          | NL           | ND           | ND                       |
| <i>OFD1</i> (59)                      | <i>Ofd1</i>                          | AB                                | ND          | AB            | AB                           | AB          | AB           | AB           | AB                       |
| <i>PDE6D</i> (208)                    | <i>Pde6d</i>                         | ND                                | AB          | ND            | ND                           | ND          | ND           | ND           | ND                       |
| <i>PIBF1</i><br>MGI: 1261910          | <i>Pibf1</i>                         | AB                                | ND          | AB            | AB                           | ND          | ND           | ND           | ND                       |
| <i>RPGRIP1L</i> (192)                 | <i>Rpgrip1l</i><br><i>ftm fantom</i> | AB                                | AB          | AB            | AB                           | AB          | AB           | AB           | AB                       |
| <i>SUFU</i> (39, 79,<br>175)          | <i>Sufu</i>                          | AB                                | AB          | AB            | AB                           | AB          | AB           | ND           | AB                       |
| <i>TCTN1</i> (64, 145)                | <i>Tctn1</i><br><i>kerouac</i>       | AB                                | ND          | AB            | AB                           | AB          | AB           | AB           | ND                       |
| <i>TCTN2</i> (150)                    | <i>Tctn2</i>                         | AB                                | AB          | AB            | AB                           | AB          | AB           | AB           | AB                       |
| <i>TCTN3</i> (195)                    | <i>Tctn3</i>                         | AB                                | AB          | AB            | AB                           | AB          | ND           | ND           | ND                       |
| <i>TMEM67</i> (64)                    | <i>Tmem67</i>                        | AB                                | ND          | ND            | ND                           | ND          | AB           | AB           | ND                       |
| <i>TMEM107</i> (26)                   | <i>Tmem107</i>                       | AB                                | AB          | ND            | AB                           | ND          | ND           | ND           | AB                       |
| <i>TMEM138</i><br>MGI: 1920232        | <i>Tmem138</i>                       | ND                                | ND          | ND            | ND                           | ND          | ND           | ND           | ND                       |
| <i>TMEM218</i> (194)                  | <i>Tmem218</i>                       | ND                                | ND          | ND            | ND                           | ND          | AB           | ND           | ND                       |
| <i>TMEM231</i> (146)                  | <i>Tmem231</i>                       | AB                                | AB          | ND            | AB                           | AB          | ND           | ND           | ND                       |
| <i>TMEM237</i><br>MGI: 2138365        | <i>Tmem237</i>                       | AB                                | ND          | ND            | ND                           | ND          | ND           | ND           | ND                       |

1. !!! INVALID CITATION !!! .
2. Abdelhamed ZA, Wheway G, Szymanska K, Natarajan S, Toomes C, et al. 2013. Variable expressivity of ciliopathy neurological phenotypes that encompass Meckel-Gruber syndrome and Joubert syndrome is caused by complex de-regulated ciliogenesis, Shh and Wnt signalling defects. *Hum Mol Genet* 22: 1358-72
3. Alazami AM, Alshammari MJ, Baig M, Salih MA, Hassan HH, Alkuraya FS. 2014. NPHP4 mutation is linked to cerebello-oculo-renal syndrome and male infertility. *Clin Genet* 85: 371-5
4. Alby C, Piquand K, Huber C, Megarbane A, Ichkou A, et al. 2015. Mutations in KIAA0586 Cause Lethal Ciliopathies Ranging from a Hydrolethalus Phenotype to Short-Rib Polydactyly Syndrome. *Am J Hum Genet* 97: 311-8
5. Alkanderi S, Molinari E, Shaheen R, Elmaghloob Y, Stephen LA, et al. 2018. ARL3 Mutations Cause Joubert Syndrome by Disrupting Ciliary Protein Composition. *Am J Hum Genet* 103: 612-20
6. Arts HH, Doherty D, van Beersum SE, Parisi MA, Letteboer SJ, et al. 2007. Mutations in the gene encoding the basal body protein RPGRIP1L, a nephrocystin-4 interactor, cause Joubert syndrome. *Nat Genet* 39: 882-8
7. Asadollahi R, Strauss JE, Zenker M, Beuing O, Edvardson S, et al. 2018. Clinical and experimental evidence suggest a link between KIF7 and C5orf42-related ciliopathies through Sonic Hedgehog signaling. *Eur J Hum Genet* 26: 197-209
8. Ashe A, Butterfield NC, Town L, Courtney AD, Cooper AN, et al. 2012. Mutations in mouse Ift144 model the craniofacial, limb and rib defects in skeletal ciliopathies. *Hum Mol Genet* 21: 1808-23
9. Attanasio M, Uhlenhaut NH, Sousa VH, O'Toole JF, Otto E, et al. 2007. Loss of GLIS2 causes nephronophthisis in humans and mice by increased apoptosis and fibrosis. *Nat Genet* 39: 1018-24
10. Baala L, Romano S, Khaddour R, Saunier S, Smith UM, et al. 2007. The Meckel-Gruber syndrome gene, MKS3, is mutated in Joubert syndrome. *Am J Hum Genet* 80: 186-94
11. Bachmann-Gagescu R, Dempsey JC, Phelps IG, O'Roak BJ, Knutzen DM, et al. 2015. Joubert syndrome: a model for untangling recessive disorders with extreme genetic heterogeneity. *J Med Genet* 52: 514-22
12. Bachmann-Gagescu R, Phelps IG, Dempsey JC, Sharma VA, Ishak GE, et al. 2015. KIAA0586 is Mutated in Joubert Syndrome. *Hum Mutat* 36: 831-5
13. Bangs F, Antonio N, Thongnuek P, Welten M, Davey MG, et al. 2011. Generation of mice with functional inactivation of talpid3, a gene first identified in chicken. *Development* 138: 3261-72
14. Bashford AL, Subramanian V. 2019. Mice with a conditional deletion of Talpid3 (KIAA0586) - a model for Joubert syndrome. *J Pathol* 248: 396-408
15. Bay SN, Long AB, Caspary T. 2018. Disruption of the ciliary GTPase Arl13b suppresses Sonic hedgehog overactivation and inhibits medulloblastoma formation. *Proc Natl Acad Sci U S A* 115: 1570-75
16. Beck BB, Phillips JB, Bartram MP, Wegner J, Thoenes M, et al. 2014. Mutation of POC1B in a severe syndromic retinal ciliopathy. *Hum Mutat* 35: 1153-62
17. Ben J, Elworthy S, Ng AS, van Eeden F, Ingham PW. 2011. Targeted mutation of the talpid3 gene in zebrafish reveals its conserved requirement for ciliogenesis and Hedgehog signalling across the vertebrates. *Development* 138: 4969-78
18. Bielas SL, Silhavy JL, Brancati F, Kisseleva MV, Al-Gazali L, et al. 2009. Mutations in INPP5E, encoding inositol polyphosphate-5-phosphatase E, link phosphatidylinositol signaling to the ciliopathies. *Nat Genet* 41: 1032-6
19. Breslow DK, Hoogendoorn S, Kopp AR, Morgens DW, Vu BK, et al. 2018. A CRISPR-based screen for Hedgehog signaling provides insights into ciliary function and ciliopathies. *Nat Genet* 50: 460-71
20. Brooks EC, Bonatto Paese CL, Carroll AH, Struve JN, Nagy N, Bruggmann SA. 2021. Mutation in the Ciliary Protein C2CD3 Reveals Organ-Specific Mechanisms of Hedgehog Signal Transduction in Avian Embryos. *J Dev Biol* 9
21. Buecker S, Simacek T, Ingwersen B, Terwiel S, Simonsmeier BA. 2020. Physical activity and subjective well-being in healthy individuals: a meta-analytic review. *Health Psychol Rev.* 1-19
22. Burckle C, Gaude HM, Vesque C, Silbermann F, Salomon R, et al. 2011. Control of the Wnt pathways by nephrocystin-4 is required for morphogenesis of the zebrafish pronephros. *Hum Mol Genet* 20: 2611-27
23. Burnicka-Turek O, Steimle JD, Huang W, Felker L, Kamp A, et al. 2016. Cilia gene mutations cause atrioventricular septal defects by multiple mechanisms. *Hum Mol Genet* 25: 3011-28

24. Cantagrel V, Silhavy JL, Bielas SL, Swistun D, Marsh SE, et al. 2008. Mutations in the cilia gene ARL13B lead to the classical form of Joubert syndrome. *Am J Hum Genet* 83: 170-9
25. Caspary T, Larkins CE, Anderson KV. 2007. The graded response to Sonic Hedgehog depends on cilia architecture. *Dev Cell* 12: 767-78
26. Cela P, Hampl M, Shylo NA, Christopher KJ, Kavkova M, et al. 2018. Ciliopathy Protein Tmem107 Plays Multiple Roles in Craniofacial Development. *J Dent Res* 97: 108-17
27. Chaki M, Airik R, Ghosh AK, Giles RH, Chen R, et al. 2012. Exome capture reveals ZNF423 and CEP164 mutations, linking renal ciliopathies to DNA damage response signaling. *Cell* 150: 533-48
28. Chang CF, Schock EN, O'Hare EA, Dodgson J, Cheng HH, et al. 2014. The cellular and molecular etiology of the craniofacial defects in the avian ciliopathic mutant talpid2. *Development* 141: 3003-12
29. Chavez M, Ena S, Van Sande J, de Kerchove d'Exaerde A, Schurmans S, Schiffmann SN. 2015. Modulation of Ciliary Phosphoinositide Content Regulates Trafficking and Sonic Hedgehog Signaling Output. *Dev Cell* 34: 338-50
30. Chen C, Xu Q, Zhang Y, Davies BA, Huang Y, et al. 2021. Ciliopathy protein HYLS1 coordinates the biogenesis and signaling of primary cilia by activating the ciliary lipid kinase PIPKIgamma. *Sci Adv* 7
31. Chen J, Laclef C, Moncayo A, Snedecor ER, Yang N, et al. 2015. The ciliopathy gene Rpgrip1l is essential for hair follicle development. *J Invest Dermatol* 135: 701-09
32. Chen MH, Wilson CW, Li YJ, Law KK, Lu CS, et al. 2009. Cilium-independent regulation of Gli protein function by Sufu in Hedgehog signaling is evolutionarily conserved. *Genes Dev* 23: 1910-28
33. Cheung HO, Zhang X, Ribeiro A, Mo R, Makino S, et al. 2009. The kinesin protein Kif7 is a critical regulator of Gli transcription factors in mammalian hedgehog signaling. *Sci Signal* 2: ra29
34. Chevrier V, Bruel AL, Van Dam TJ, Franco B, Lo Scalzo M, et al. 2016. OFIP/KIAA0753 forms a complex with OFD1 and FOR20 at pericentriolar satellites and centrosomes and is mutated in one individual with oral-facial-digital syndrome. *Hum Mol Genet* 25: 497-513
35. Chih B, Liu P, Chinn Y, Chalouni C, Komuves LG, et al. 2011. A ciliopathy complex at the transition zone protects the cilia as a privileged membrane domain. *Nat Cell Biol* 14: 61-72
36. Choi YJ, Halbritter J, Braun DA, Schueler M, Schapiro D, et al. 2019. Mutations of ADAMTS9 Cause Nephronophthisis-Related Ciliopathy. *Am J Hum Genet* 104: 45-54
37. Coene KL, Roepman R, Doherty D, Afroze B, Kroes HY, et al. 2009. OFD1 is mutated in X-linked Joubert syndrome and interacts with LCA5-encoded lebercilin. *Am J Hum Genet* 85: 465-81
38. Constable S, Long AB, Floyd KA, Schurmans S, Caspary T. 2020. The ciliary phosphatidylinositol phosphatase Inpp5e plays positive and negative regulatory roles in Shh signaling. *Development* 147
39. Cooper AF, Yu KP, Brueckner M, Brailey LL, Johnson L, et al. 2005. Cardiac and CNS defects in a mouse with targeted disruption of suppressor of fused. *Development* 132: 4407-17
40. Cui C, Chatterjee B, Francis D, Yu Q, SanAgustin JT, et al. 2011. Disruption of Mks1 localization to the mother centriole causes cilia defects and developmental malformations in Meckel-Gruber syndrome. *Dis Model Mech* 4: 43-56
41. D'Angelo A, De Angelis A, Avallone B, Piscopo I, Tammamaro R, et al. 2012. Ofd1 controls dorso-ventral patterning and axoneme elongation during embryonic brain development. *PLoS One* 7: e52937
42. Dafinger C, Liebau MC, Elsayed SM, Hellenbroich Y, Boltshauser E, et al. 2011. Mutations in KIF7 link Joubert syndrome with Sonic Hedgehog signaling and microtubule dynamics. *J Clin Invest* 121: 2662-7
43. Damerla RR, Cui C, Gabriel GC, Liu X, Craige B, et al. 2015. Novel Jbts17 mutant mouse model of Joubert syndrome with cilia transition zone defects and cerebellar and other ciliopathy related anomalies. *Hum Mol Genet* 24: 3994-4005
44. Davey MG, McTeir L, Barrie AM, Freem LJ, Stephen LA. 2014. Loss of cilia causes embryonic lung hypoplasia, liver fibrosis, and cholestasis in the talpid3 ciliopathy mutant. *Organogenesis* 10: 177-85
45. Davey MG, Paton IR, Yin Y, Schmidt M, Bangs FK, et al. 2006. The chicken talpid3 gene encodes a novel protein essential for Hedgehog signaling. *Genes Dev* 20: 1365-77
46. Davis EE, Zhang Q, Liu Q, Diplas BH, Davey LM, et al. 2011. TTC21B contributes both causal and modifying alleles across the ciliopathy spectrum. *Nat Genet* 43: 189-96
47. De Mori R, Romani M, D'Arrigo S, Zaki MS, Loreface E, et al. 2017. Hypomorphic Recessive Variants in SUFU Impair the Sonic Hedgehog Pathway and Cause Joubert Syndrome with Cranio-facial and Skeletal Defects. *Am J Hum Genet* 101: 552-63
48. Delous M, Baala L, Salomon R, Laclef C, Vierkotten J, et al. 2007. The ciliary gene RPGRIP1L is mutated in cerebello-oculo-renal syndrome (Joubert syndrome type B) and Meckel syndrome. *Nat Genet* 39: 875-81



49. Dixon-Salazar TJ, Silhavy JL, Udpa N, Schroth J, Bielas S, et al. 2012. Exome sequencing can improve diagnosis and alter patient management. *Sci Transl Med* 4: 138ra78
50. Dowdle WE, Robinson JF, Kneist A, Sirerol-Piquer MS, Frints SG, et al. 2011. Disruption of a ciliary B9 protein complex causes Meckel syndrome. *Am J Hum Genet* 89: 94-110
51. Duldulao NA, Lee S, Sun Z. 2009. Cilia localization is essential for in vivo functions of the Joubert syndrome protein Arl13b/Scorpion. *Development* 136: 4033-42
52. Dyson JM, Conduit SE, Feeney SJ, Hakim S, DiTommaso T, et al. 2017. INPP5E regulates phosphoinositide-dependent cilia transition zone function. *J Cell Biol* 216: 247-63
53. Endoh-Yamagami S, Evangelista M, Wilson D, Wen X, Theunissen JW, et al. 2009. The mammalian Cos2 homolog Kif7 plays an essential role in modulating Hh signal transduction during development. *Curr Biol* 19: 1320-6
54. Epting D, Senaratne LDS, Ott E, Holmgren A, Sumathipala D, et al. 2020. Loss of CBY1 results in a ciliopathy characterized by features of Joubert syndrome. *Hum Mutat* 41: 2179-94
55. Failler M, Gee HY, Krug P, Joo K, Halbritter J, et al. 2014. Mutations of CEP83 cause infantile nephronophthisis and intellectual disability. *Am J Hum Genet* 94: 905-14
56. Ferent J, Constable S, Gigante ED, Yam PT, Mariani LE, et al. 2019. The Ciliary Protein Arl13b Functions Outside of the Primary Cilium in Shh-Mediated Axon Guidance. *Cell Rep* 29: 3356-66 e3
57. Ferland RJ, Eyaid W, Collura RV, Tully LD, Hill RS, et al. 2004. Abnormal cerebellar development and axonal decussation due to mutations in AH11 in Joubert syndrome. *Nat Genet* 36: 1008-13
58. Ferrante MI, Romio L, Castro S, Collins JE, Goulding DA, et al. 2009. Convergent extension movements and ciliary function are mediated by ofd1, a zebrafish orthologue of the human oral-facial-digital type 1 syndrome gene. *Hum Mol Genet* 18: 289-303
59. Ferrante MI, Zullo A, Barra A, Bimonte S, Messaddeq N, et al. 2006. Oral-facial-digital type I protein is required for primary cilia formation and left-right axis specification. *Nat Genet* 38: 112-7
60. Filges I, Nosova E, Bruder E, Tercanli S, Townsend K, et al. 2014. Exome sequencing identifies mutations in KIF14 as a novel cause of an autosomal recessive lethal fetal ciliopathy phenotype. *Clin Genet* 86: 220-8
61. Frank V, den Hollander AI, Bruchle NO, Zonneveld MN, Nurnberg G, et al. 2008. Mutations of the CEP290 gene encoding a centrosomal protein cause Meckel-Gruber syndrome. *Hum Mutat* 29: 45-52
62. Friedland-Little JM, Hoffmann AD, Ocbina PJ, Peterson MA, Bosman JD, et al. 2011. A novel murine allele of Intraflagellar Transport Protein 172 causes a syndrome including VACTERL-like features with hydrocephalus. *Hum Mol Genet* 20: 3725-37
63. Frikstad KM, Molinari E, Thoresen M, Ramsbottom SA, Hughes F, et al. 2019. A CEP104-CSPP1 Complex Is Required for Formation of Primary Cilia Competent in Hedgehog Signaling. *Cell Rep* 28: 1907-22 e6
64. Garcia-Gonzalo FR, Corbit KC, Sirerol-Piquer MS, Ramaswami G, Otto EA, et al. 2011. A transition zone complex regulates mammalian ciliogenesis and ciliary membrane composition. *Nat Genet* 43: 776-84
65. Garcia-Gonzalo FR, Phua SC, Roberson EC, Garcia G, 3rd, Abedin M, et al. 2015. Phosphoinositides Regulate Ciliary Protein Trafficking to Modulate Hedgehog Signaling. *Dev Cell* 34: 400-09
66. Gigante ED, Taylor MR, Ivanova AA, Kahn RA, Caspary T. 2020. ARL13B regulates Sonic hedgehog signaling from outside primary cilia. *Elife* 9
67. Goetz SC, Bangs F, Barrington CL, Katsanis N, Anderson KV. 2017. The Meckel syndrome-associated protein MKS1 functionally interacts with components of the BBSome and IFT complexes to mediate ciliary trafficking and hedgehog signaling. *PLoS One* 12: e0173399
68. Golling G, Amsterdam A, Sun Z, Antonelli M, Maldonado E, et al. 2002. Insertional mutagenesis in zebrafish rapidly identifies genes essential for early vertebrate development. *Nat Genet* 31: 135-40
69. Gordon NT, Arts HH, Parisi MA, Coene KL, Letteboer SJ, et al. 2008. CC2D2A is mutated in Joubert syndrome and interacts with the ciliopathy-associated basal body protein CEP290. *Am J Hum Genet* 83: 559-71
70. Gorivodsky M, Mukhopadhyay M, Wilsch-Braeuninger M, Phillips M, Teufel A, et al. 2009. Intraflagellar transport protein 172 is essential for primary cilia formation and plays a vital role in patterning the mammalian brain. *Dev Biol* 325: 24-32
71. Haider NB, Carmi R, Shalev H, Sheffield VC, Landau D. 1998. A Bedouin kindred with infantile nephronophthisis demonstrates linkage to chromosome 9 by homozygosity mapping. *Am J Hum Genet* 63: 1404-10

72. Halbritter J, Bizet AA, Schmidts M, Porath JD, Braun DA, et al. 2013. Defects in the IFT-B component IFT172 cause Jeune and Mainzer-Saldino syndromes in humans. *Am J Hum Genet* 93: 915-25
73. Halbritter J, Porath JD, Diaz KA, Braun DA, Kohl S, et al. 2013. Identification of 99 novel mutations in a worldwide cohort of 1,056 patients with a nephronophthisis-related ciliopathy. *Hum Genet* 132: 865-84
74. Hammarsjo A, Wang Z, Vaz R, Taylan F, Sedghi M, et al. 2017. Novel KIAA0753 mutations extend the phenotype of skeletal ciliopathies. *Sci Rep* 7: 15585
75. Hanke-Gogokhia C, Wu Z, Gerstner CD, Frederick JM, Zhang H, Baehr W. 2016. Arf-like Protein 3 (ARL3) Regulates Protein Trafficking and Ciliogenesis in Mouse Photoreceptors. *J Biol Chem* 291: 7142-55
76. He M, Subramanian R, Bangs F, Omelchenko T, Liem KF, Jr., et al. 2014. The kinesin-4 protein Kif7 regulates mammalian Hedgehog signalling by organizing the cilium tip compartment. *Nat Cell Biol* 16: 663-72
77. Hildebrandt F, Otto E, Rensing C, Nothwang HG, Vollmer M, et al. 1997. A novel gene encoding an SH3 domain protein is mutated in nephronophthisis type 1. *Nat Genet* 17: 149-53
78. Hoelzl MA, Heby-Henricson K, Bilousova G, Rozell B, Kuiper RV, et al. 2015. Suppressor of Fused Plays an Important Role in Regulating Mesodermal Differentiation of Murine Embryonic Stem Cells In Vivo. *Stem Cells Dev* 24: 2547-60
79. Hoelzl MA, Heby-Henricson K, Gerling M, Dias JM, Kuiper RV, et al. 2017. Differential requirement of SUFU in tissue development discovered in a hypomorphic mouse model. *Dev Biol* 429: 132-46
80. Hoff S, Halbritter J, Epting D, Frank V, Nguyen TM, et al. 2013. ANKS6 is a central component of a nephronophthisis module linking NEK8 to INVS and NPHP3. *Nat Genet* 45: 951-6
81. Hoover AN, Wynkoop A, Zeng H, Jia J, Niswander LA, Liu A. 2008. C2cd3 is required for cilia formation and Hedgehog signaling in mouse. *Development* 135: 4049-58
82. Hopp K, Heyer CM, Hommerding CJ, Henke SA, Sundsbak JL, et al. 2011. B9D1 is revealed as a novel Meckel syndrome (MKS) gene by targeted exon-enriched next-generation sequencing and deletion analysis. *Hum Mol Genet* 20: 2524-34
83. Hsu SH, Zhang X, Yu C, Li ZJ, Wunder JS, et al. 2011. Kif7 promotes hedgehog signaling in growth plate chondrocytes by restricting the inhibitory function of Sufu. *Development* 138: 3791-801
84. Huang L, Szymanska K, Jensen VL, Janecke AR, Innes AM, et al. 2011. TMEM237 is mutated in individuals with a Joubert syndrome related disorder and expands the role of the TMEM family at the ciliary transition zone. *Am J Hum Genet* 89: 713-30
85. Huangfu D, Anderson KV. 2005. Cilia and Hedgehog responsiveness in the mouse. *Proc Natl Acad Sci U S A* 102: 11325-30
86. Huangfu D, Liu A, Rakeman AS, Murcia NS, Niswander L, Anderson KV. 2003. Hedgehog signalling in the mouse requires intraflagellar transport proteins. *Nature* 426: 83-7
87. Hynes AM, Giles RH, Srivastava S, Eley L, Whitehead J, et al. 2014. Murine Joubert syndrome reveals Hedgehog signaling defects as a potential therapeutic target for nephronophthisis. *Proc Natl Acad Sci U S A* 111: 9893-8
88. Inskeep KA, Zarate YA, Monteil D, Spranger J, Doherty D, et al. 2021. Genetic and phenotypic heterogeneity in KIAA0753-related ciliopathies. *Am J Med Genet A*
89. Jacoby M, Cox JJ, Gayral S, Hampshire DJ, Ayub M, et al. 2009. INPP5E mutations cause primary cilium signaling defects, ciliary instability and ciliopathies in human and mouse. *Nat Genet* 41: 1027-31
90. Jiang ST, Chiou YY, Wang E, Chien YL, Ho HH, et al. 2009. Essential role of nephrocystin in photoreceptor intraflagellar transport in mouse. *Hum Mol Genet* 18: 1566-77
91. Jiang ST, Chiou YY, Wang E, Lin HK, Lee SP, et al. 2008. Targeted disruption of Nphp1 causes male infertility due to defects in the later steps of sperm morphogenesis in mice. *Hum Mol Genet* 17: 3368-79
92. Johnston JJ, Lee C, Wentzensen IM, Parisi MA, Crenshaw MM, et al. 2017. Compound heterozygous alterations in intraflagellar transport protein CLUAP1 in a child with a novel Joubert and oral-facial-digital overlap syndrome. *Cold Spring Harb Mol Case Stud* 3
93. Kilander MBC, Wang CH, Chang CH, Nestor JE, Herold K, et al. 2018. A rare human CEP290 variant disrupts the molecular integrity of the primary cilium and impairs Sonic Hedgehog machinery. *Sci Rep* 8: 17335
94. Kim JJ, Gill PS, Rotin L, van Eede M, Henkelman RM, et al. 2011. Suppressor of fused controls mid-hindbrain patterning and cerebellar morphogenesis via GLI3 repressor. *J Neurosci* 31: 1825-36
95. Kobayashi T, Tanaka K, Mashima Y, Shoda A, Tokuda M, Itoh H. 2020. CEP164 Deficiency Causes Hyperproliferation of Pancreatic Cancer Cells. *Front Cell Dev Biol* 8: 587691

96. Kyttala M, Tallila J, Salonen R, Kopra O, Kohlschmidt N, et al. 2006. MKS1, encoding a component of the flagellar apparatus basal body proteome, is mutated in Meckel syndrome. *Nat Genet* 38: 155-7
97. Lai CK, Gupta N, Wen X, Rangell L, Chih B, et al. 2011. Functional characterization of putative cilia genes by high-content analysis. *Mol Biol Cell* 22: 1104-19
98. Lambacher NJ, Bruel AL, van Dam TJ, Szymanska K, Slaats GG, et al. 2016. TMEM107 recruits ciliopathy proteins to subdomains of the ciliary transition zone and causes Joubert syndrome. *Nat Cell Biol* 18: 122-31
99. Lancaster MA, Gopal DJ, Kim J, Saleem SN, Silhavy JL, et al. 2011. Defective Wnt-dependent cerebellar midline fusion in a mouse model of Joubert syndrome. *Nat Med* 17: 726-31
100. Lancaster MA, Louie CM, Silhavy JL, Sintasath L, Decambre M, et al. 2009. Impaired Wnt-beta-catenin signaling disrupts adult renal homeostasis and leads to cystic kidney ciliopathy. *Nat Med* 15: 1046-54
101. Larkins CE, Aviles GD, East MP, Kahn RA, Caspary T. 2011. Arl13b regulates ciliogenesis and the dynamic localization of Shh signaling proteins. *Mol Biol Cell* 22: 4694-703
102. Latour BL, Van De Weghe JC, Rusterholz TD, Letteboer SJ, Gomez A, et al. 2020. Dysfunction of the ciliary ARMC9/TOGARAM1 protein module causes Joubert syndrome. *J Clin Invest* 130: 4423-39
103. Law KK, Makino S, Mo R, Zhang X, Puvindran V, Hui CC. 2012. Antagonistic and cooperative actions of Kif7 and Sufu define graded intracellular Gli activities in Hedgehog signaling. *PLoS One* 7: e50193
104. Lee JE, Silhavy JL, Zaki MS, Schroth J, Bielas SL, et al. 2012. CEP41 is mutated in Joubert syndrome and is required for tubulin glutamylation at the cilium. *Nat Genet* 44: 193-9
105. Lee JH, Silhavy JL, Lee JE, Al-Gazali L, Thomas S, et al. 2012. Evolutionarily assembled cis-regulatory module at a human ciliopathy locus. *Science* 335: 966-9
106. Lee SH, Nam TS, Li W, Kim JH, Yoon W, et al. 2017. Functional validation of novel MKS3/TMEM67 mutations in COACH syndrome. *Sci Rep* 7: 10222
107. Leitch CC, Zaghloul NA, Davis EE, Stoetzel C, Diaz-Font A, et al. 2008. Hypomorphic mutations in syndromic encephalocele genes are associated with Bardet-Biedl syndrome. *Nat Genet* 40: 443-8
108. Lessieur EM, Fogerty J, Gaivin RJ, Song P, Perkins BD. 2017. The Ciliopathy Gene *ahi1* Is Required for Zebrafish Cone Photoreceptor Outer Segment Morphogenesis and Survival. *Invest Ophthalmol Vis Sci* 58: 448-60
109. Li J, Wang Q, Cui Y, Yang X, Li Y, et al. 2015. Suppressor of Fused Is Required for Determining Digit Number and Identity via Gli3/Fgfs/Gremlin. *PLoS One* 10: e0128006
110. Li Y, Tian X, Ma M, Jerman S, Kong S, et al. 2016. Deletion of ADP Ribosylation Factor-Like GTPase 13B Leads to Kidney Cysts. *J Am Soc Nephrol* 27: 3628-38
111. Li ZJ, Nieuwenhuis E, Nien W, Zhang X, Zhang J, et al. 2012. Kif7 regulates Gli2 through Sufu-dependent and -independent functions during skin development and tumorigenesis. *Development* 139: 4152-61
112. Liem KF, Jr., Ashe A, He M, Satir P, Moran J, et al. 2012. The IFT-A complex regulates Shh signaling through cilia structure and membrane protein trafficking. *J Cell Biol* 197: 789-800
113. Liem KF, Jr., He M, Ocbina PJ, Anderson KV. 2009. Mouse Kif7/Costal2 is a cilia-associated protein that regulates Sonic hedgehog signaling. *Proc Natl Acad Sci U S A* 106: 13377-82
114. Lin C, Chen MH, Yao E, Song H, Gacayan R, et al. 2014. Differential regulation of Gli proteins by Sufu in the lung affects PDGF signaling and myofibroblast development. *Dev Biol* 392: 324-33
115. Lindstrand A, Davis EE, Carvalho CM, Pehlivan D, Willer JR, et al. 2014. Recurrent CNVs and SNVs at the NPHP1 locus contribute pathogenic alleles to Bardet-Biedl syndrome. *Am J Hum Genet* 94: 745-54
116. Liu C, Cao R, Xu Y, Li T, Li F, et al. 2018. Rare copy number variants analysis identifies novel candidate genes in heterotaxy syndrome patients with congenital heart defects. *Genome Med* 10: 40
117. Liu YC, Couzens AL, Deshwar AR, LD BM-C, Zhang X, et al. 2014. The PPF1A1-PP2A protein complex promotes trafficking of Kif7 to the ciliary tip and Hedgehog signaling. *Sci Signal* 7: ra117
118. Lopez E, Thauvin-Robinet C, Reversade B, Khartoufi NE, Devisme L, et al. 2014. C5orf42 is the major gene responsible for OFD syndrome type VI. *Hum Genet* 133: 367-77
119. Lunt SC, Haynes T, Perkins BD. 2009. Zebrafish *ift57*, *ift88*, and *ift172* intraflagellar transport mutants disrupt cilia but do not affect hedgehog signaling. *Dev Dyn* 238: 1744-59
120. Luo M, Lin Z, Zhu T, Jin M, Meng D, et al. 2021. Disrupted intraflagellar transport due to IFT74 variants causes Joubert syndrome. *Genet Med* 23: 1041-49
121. Macia MS, Halbritter J, Delous M, Bredrup C, Gutter A, et al. 2017. Mutations in MAPKBP1 Cause Juvenile or Late-Onset Cilia-Independent Nephronophthisis. *Am J Hum Genet* 100: 323-33

122. Mahuzier A, Gaude HM, Grampa V, Anselme I, Silbermann F, et al. 2012. Dishevelled stabilization by the ciliopathy protein Rpgrip1l is essential for planar cell polarity. *J Cell Biol* 198: 927-40
123. Makino S, Zhulyn O, Mo R, Puvindran V, Zhang X, et al. 2015. T396I mutation of mouse Sufu reduces the stability and activity of Gli3 repressor. *PLoS One* 10: e0119455
124. Mariani LE, Bijlsma MF, Ivanova AA, Suciuc SK, Kahn RA, Casparly T. 2016. Arl13b regulates Shh signaling from both inside and outside the cilium. *Mol Biol Cell*
125. Massinen S, Hokkanen ME, Matsson H, Tammimies K, Tapia-Paez I, et al. 2011. Increased expression of the dyslexia candidate gene DCDC2 affects length and signaling of primary cilia in neurons. *PLoS One* 6: e20580
126. Matsushita HB, Hiraide T, Hayakawa K, Okano S, Nakashima M, et al. 2021. Compound heterozygous ADAMTS9 variants in Joubert syndrome-related disorders without renal manifestation. *Brain Dev*
127. Mollet G, Salomon R, Gribouval O, Silbermann F, Bacq D, et al. 2002. The gene mutated in juvenile nephronophthisis type 4 encodes a novel protein that interacts with nephrocystin. *Nat Genet* 32: 300-5
128. Munoz-Estrada J, Ferland RJ. 2019. Ahi1 promotes Arl13b ciliary recruitment, regulates Arl13b stability and is required for normal cell migration. *J Cell Sci* 132
129. Nandadasa S, Kraft CM, Wang LW, O'Donnell A, Patel R, et al. 2019. Secreted metalloproteases ADAMTS9 and ADAMTS20 have a non-canonical role in ciliary vesicle growth during ciliogenesis. *Nat Commun* 10: 953
130. Noguchi H, Castillo JG, Nakashima K, Pleasure SJ. 2019. Suppressor of fused controls perinatal expansion and quiescence of future dentate adult neural stem cells. *Elife* 8
131. Nozaki S, Katoh Y, Terada M, Michisaka S, Funabashi T, et al. 2017. Regulation of ciliary retrograde protein trafficking by the Joubert syndrome proteins ARL13B and INPP5E. *J Cell Sci* 130: 563-76
132. Ocbina PJ, Anderson KV. 2008. Intraflagellar transport, cilia, and mammalian Hedgehog signaling: analysis in mouse embryonic fibroblasts. *Dev Dyn* 237: 2030-8
133. Ocbina PJ, Tuson M, Anderson KV. 2009. Primary cilia are not required for normal canonical Wnt signaling in the mouse embryo. *PLoS One* 4: e6839
134. Ojeda Naharros I, Cristian FB, Zang J, Gesemann M, Ingham PW, et al. 2018. Publisher Correction: The ciliopathy protein TALPID3/KIAA0586 acts upstream of Rab8 activation in zebrafish photoreceptor outer segment formation and maintenance. *Sci Rep* 8: 12534
135. Oka M, Shimojima K, Yamamoto T, Hanaoka Y, Sato S, et al. 2016. A novel HYL1 homozygous mutation in living siblings with Joubert syndrome. *Clin Genet* 89: 739-43
136. Olbrich H, Fliegau M, Hoefele J, Kispert A, Otto E, et al. 2003. Mutations in a novel gene, NPHP3, cause adolescent nephronophthisis, tapeto-retinal degeneration and hepatic fibrosis. *Nat Genet* 34: 455-9
137. Otto EA, Hurd TW, Airik R, Chaki M, Zhou W, et al. 2010. Candidate exome capture identifies mutation of SDCCAG8 as the cause of a retinal-renal ciliopathy. *Nat Genet* 42: 840-50
138. Otto EA, Tory K, Attanasio M, Zhou W, Chaki M, et al. 2009. Hypomorphic mutations in meckelin (MKS3/TMEM67) cause nephronophthisis with liver fibrosis (NPHP11). *J Med Genet* 46: 663-70
139. Otto EA, Trapp ML, Schultheiss UT, Helou J, Quarby LM, Hildebrandt F. 2008. NEK8 mutations affect ciliary and centrosomal localization and may cause nephronophthisis. *J Am Soc Nephrol* 19: 587-92
140. Pal K, Hwang SH, Somatilaka B, Badgandi H, Jackson PK, et al. 2016. Smoothed determines beta-arrestin-mediated removal of the G protein-coupled receptor Gpr161 from the primary cilium. *J Cell Biol* 212: 861-75
141. Parisi MA, Bennett CL, Eckert ML, Dobyns WB, Gleeson JG, et al. 2004. The NPHP1 gene deletion associated with juvenile nephronophthisis is present in a subset of individuals with Joubert syndrome. *Am J Hum Genet* 75: 82-91
142. Putoux A, Baas D, Paschaki M, Morle L, Maire C, et al. 2019. Altered GLI3 and FGF8 signaling underlies acrocallosal syndrome phenotypes in Kif7 depleted mice. *Hum Mol Genet* 28: 877-87
143. Putoux A, Thomas S, Coene KL, Davis EE, Alanay Y, et al. 2011. KIF7 mutations cause fetal hydroletharus and acrocallosal syndromes. *Nat Genet* 43: 601-6
144. Rachel RA, Yamamoto EA, Dewanjee MK, May-Simera HL, Sergeev YV, et al. 2015. CEP290 alleles in mice disrupt tissue-specific cilia biogenesis and recapitulate features of syndromic ciliopathies. *Hum Mol Genet* 24: 3775-91
145. Reiter JF, Skarnes WC. 2006. Tectonic, a novel regulator of the Hedgehog pathway required for both activation and inhibition. *Genes Dev* 20: 22-7

146. Roberson EC, Dowdle WE, Ozanturk A, Garcia-Gonzalo FR, Li C, et al. 2015. TMEM231, mutated in orofacioidigital and Meckel syndromes, organizes the ciliary transition zone. *J Cell Biol* 209: 129-42
147. Romani M, Micalizzi A, Kraoua I, Dotti MT, Cavallin M, et al. 2014. Mutations in B9D1 and MKS1 cause mild Joubert syndrome: expanding the genetic overlap with the lethal ciliopathy Meckel syndrome. *Orphanet J Rare Dis* 9: 72
148. Roosing S, Rosti RO, Rosti B, de Vrieze E, Silhavy JL, et al. 2016. Identification of a homozygous nonsense mutation in KIAA0556 in a consanguineous family displaying Joubert syndrome. *Hum Genet* 135: 919-21
149. Sanders AA, de Vrieze E, Alazami AM, Alzahrani F, Malarkey EB, et al. 2015. KIAA0556 is a novel ciliary basal body component mutated in Joubert syndrome. *Genome Biol* 16: 293
150. Sang L, Miller JJ, Corbit KC, Giles RH, Brauer MJ, et al. 2011. Mapping the NPHP-JBTS-MKS protein network reveals ciliopathy disease genes and pathways. *Cell* 145: 513-28
151. Sayer JA, Otto EA, O'Toole JF, Nurnberg G, Kennedy MA, et al. 2006. The centrosomal protein nephrocystin-6 is mutated in Joubert syndrome and activates transcription factor ATF4. *Nat Genet* 38: 674-81
152. Schafer T, Putz M, Lienkamp S, Ganner A, Bergbreiter A, et al. 2008. Genetic and physical interaction between the NPHP5 and NPHP6 gene products. *Hum Mol Genet* 17: 3655-62
153. Schrick JJ, Vogel P, Abuin A, Hampton B, Rice DS. 2006. ADP-ribosylation factor-like 3 is involved in kidney and photoreceptor development. *Am J Pathol* 168: 1288-98
154. Schroder S, Li Y, Yigit G, Altmuller J, Bader I, et al. 2021. Heterozygous truncating variants in SUFU cause congenital ocular motor apraxia. *Genet Med* 23: 341-51
155. Schueler M, Braun DA, Chandrasekar G, Gee HY, Klasson TD, et al. 2015. DCDC2 mutations cause a renal-hepatic ciliopathy by disrupting Wnt signaling. *Am J Hum Genet* 96: 81-92
156. Schwarz N, Lane A, Jovanovic K, Parfitt DA, Aguila M, et al. 2017. Arl3 and RP2 regulate the trafficking of ciliary tip kinesins. *Hum Mol Genet* 26: 2480-92
157. Serpieri V, D'Abrusco F, Dempsey JC, Cheng YH, Arrigoni F, et al. 2021. SUFU haploinsufficiency causes a recognisable neurodevelopmental phenotype at the mild end of the Joubert syndrome spectrum. *J Med Genet*
158. Shaheen R, Almoisheer A, Faqeih E, Babay Z, Monies D, et al. 2015. Identification of a novel MKS locus defined by TMEM107 mutation. *Hum Mol Genet* 24: 5211-8
159. Shaheen R, Ansari S, Mardawi EA, Alshammari MJ, Alkuraya FS. 2013. Mutations in TMEM231 cause Meckel-Gruber syndrome. *J Med Genet* 50: 160-2
160. Shaheen R, Faqeih E, Alshammari MJ, Swaid A, Al-Gazali L, et al. 2013. Genomic analysis of Meckel-Gruber syndrome in Arabs reveals marked genetic heterogeneity and novel candidate genes. *Eur J Hum Genet* 21: 762-8
161. Shaheen R, Faqeih E, Seidahmed MZ, Sunker A, Alali FE, et al. 2011. A TCTN2 mutation defines a novel Meckel Gruber syndrome locus. *Hum Mutat* 32: 573-8
162. Shaheen R, Jiang N, Alzahrani F, Ewida N, Al-Sheddi T, et al. 2019. Bi-allelic Mutations in FAM149B1 Cause Abnormal Primary Cilium and a Range of Ciliopathy Phenotypes in Humans. *Am J Hum Genet* 104: 731-37
163. Shaheen R, Schmidts M, Faqeih E, Hashem A, Lausch E, et al. 2015. A founder CEP120 mutation in Jeune asphyxiating thoracic dystrophy expands the role of centriolar proteins in skeletal ciliopathies. *Hum Mol Genet* 24: 1410-9
164. Shaheen R, Shamseldin HE, Loucks CM, Seidahmed MZ, Ansari S, et al. 2014. Mutations in CSPP1, encoding a core centrosomal protein, cause a range of ciliopathy phenotypes in humans. *Am J Hum Genet* 94: 73-9
165. Shaheen R, Szymanska K, Basu B, Patel N, Ewida N, et al. 2016. Characterizing the morbid genome of ciliopathies. *Genome Biol* 17: 242
166. Shimada H, Lu Q, Insinna-Kettenhofen C, Nagashima K, English MA, et al. 2017. In Vitro Modeling Using Ciliopathy-Patient-Derived Cells Reveals Distinct Cilia Dysfunctions Caused by CEP290 Mutations. *Cell Rep* 20: 384-96
167. Simpson MA, Cross HE, Cross L, Helmuth M, Crosby AH. 2009. Lethal cystic kidney disease in Amish neonates associated with homozygous nonsense mutation of NPHP3. *Am J Kidney Dis* 53: 790-5
168. Smith UM, Consugar M, Tee LJ, McKee BM, Maina EN, et al. 2006. The transmembrane protein meckelin (MKS3) is mutated in Meckel-Gruber syndrome and the wpk rat. *Nat Genet* 38: 191-6

169. Srivastava S, Ramsbottom SA, Molinari E, Alkanderi S, Filby A, et al. 2017. A human patient-derived cellular model of Joubert syndrome reveals ciliary defects which can be rescued with targeted therapies. *Hum Mol Genet* 26: 4657-67
170. Srour M, Hamdan FF, McKnight D, Davis E, Mandel H, et al. 2015. Joubert Syndrome in French Canadians and Identification of Mutations in CEP104. *Am J Hum Genet* 97: 744-53
171. Srour M, Hamdan FF, Schwartzentruber JA, Patry L, Ospina LH, et al. 2012. Mutations in TMEM231 cause Joubert syndrome in French Canadians. *J Med Genet* 49: 636-41
172. Srour M, Schwartzentruber J, Hamdan FF, Ospina LH, Patry L, et al. 2012. Mutations in C5ORF42 cause Joubert syndrome in the French Canadian population. *Am J Hum Genet* 90: 693-700
173. Su CY, Bay SN, Mariani LE, Hillman MJ, Caspary T. 2012. Temporal deletion of Arl13b reveals that a mispatterned neural tube corrects cell fate over time. *Development* 139: 4062-71
174. Sun Z, Amsterdam A, Pazour GJ, Cole DG, Miller MS, Hopkins N. 2004. A genetic screen in zebrafish identifies cilia genes as a principal cause of cystic kidney. *Development* 131: 4085-93
175. Svard J, Heby-Henricson K, Persson-Lek M, Rozell B, Lauth M, et al. 2006. Genetic elimination of Suppressor of fused reveals an essential repressor function in the mammalian Hedgehog signaling pathway. *Dev Cell* 10: 187-97
176. Svard J, Rozell B, Toftgard R, Teglund S. 2009. Tumor suppressor gene co-operativity in compound Patched1 and suppressor of fused heterozygous mutant mice. *Mol Carcinog* 48: 408-19
177. Tallila J, Jakkula E, Peltonen L, Salonen R, Kestila M. 2008. Identification of CC2D2A as a Meckel syndrome gene adds an important piece to the ciliopathy puzzle. *Am J Hum Genet* 82: 1361-7
178. Tay SY, Ingham PW, Roy S. 2005. A homologue of the Drosophila kinesin-like protein Costal2 regulates Hedgehog signal transduction in the vertebrate embryo. *Development* 132: 625-34
179. Terhune EA, Cuevas MT, Monley AM, Wethey CI, Chen X, et al. 2021. Mutations in KIF7 implicated in idiopathic scoliosis in humans and axial curvatures in zebrafish. *Hum Mutat* 42: 392-407
180. Thauvin-Robinet C, Lee JS, Lopez E, Herranz-Perez V, Shida T, et al. 2014. The oral-facial-digital syndrome gene C2CD3 encodes a positive regulator of centriole elongation. *Nat Genet* 46: 905-11
181. Thomas S, Legendre M, Saunier S, Bessieres B, Alby C, et al. 2012. TCTN3 mutations cause Mohr-Majewski syndrome. *Am J Hum Genet* 91: 372-8
182. Thomas S, Wright KJ, Le Corre S, Micalizzi A, Romani M, et al. 2014. A homozygous PDE6D mutation in Joubert syndrome impairs targeting of farnesylated INPP5E protein to the primary cilium. *Hum Mutat* 35: 137-46
183. Town T, Breunig JJ, Sarkisian MR, Spilianakis C, Ayoub AE, et al. 2008. The stumpy gene is required for mammalian ciliogenesis. *Proc Natl Acad Sci U S A* 105: 2853-8
184. Tran PV, Haycraft CJ, Besschetnova TY, Turbe-Doan A, Stottmann RW, et al. 2008. THM1 negatively modulates mouse sonic hedgehog signal transduction and affects retrograde intraflagellar transport in cilia. *Nat Genet* 40: 403-10
185. Tran PV, Talbott GC, Turbe-Doan A, Jacobs DT, Schonfeld MP, et al. 2014. Downregulating hedgehog signaling reduces renal cystogenic potential of mouse models. *J Am Soc Nephrol* 25: 2201-12
186. Tuz K, Bachmann-Gagescu R, O'Day DR, Hua K, Isabella CR, et al. 2014. Mutations in CSPP1 cause primary cilia abnormalities and Joubert syndrome with or without Jeune asphyxiating thoracic dystrophy. *Am J Hum Genet* 94: 62-72
187. Valente EM, Logan CV, Mougou-Zerelli S, Lee JH, Silhavy JL, et al. 2010. Mutations in TMEM216 perturb ciliogenesis and cause Joubert, Meckel and related syndromes. *Nat Genet* 42: 619-25
188. Van Bergen NJ, Ahmed SM, Collins F, Cowley M, Vetro A, et al. 2020. Mutations in the exocyst component EXOC2 cause severe defects in human brain development. *J Exp Med* 217
189. Van De Weghe JC, Giordano JL, Mathijssen IB, Mojarrad M, Lugtenberg D, et al. 2021. TMEM218 dysfunction causes ciliopathies, including Joubert and Meckel syndromes. *HGG Adv* 2
190. Van De Weghe JC, Rusterholz TDS, Latour B, Grout ME, Aldinger KA, et al. 2017. Mutations in ARMC9, which Encodes a Basal Body Protein, Cause Joubert Syndrome in Humans and Ciliopathy Phenotypes in Zebrafish. *Am J Hum Genet* 101: 23-36
191. Veleri S, Manjunath SH, Fariss RN, May-Simera H, Brooks M, et al. 2014. Ciliopathy-associated gene Cc2d2a promotes assembly of subdistal appendages on the mother centriole during cilia biogenesis. *Nat Commun* 5: 4207
192. Vierkotten J, Dildrop R, Peters T, Wang B, Ruther U. 2007. Ftm is a novel basal body protein of cilia involved in Shh signalling. *Development* 134: 2569-77

193. Vilboux T, Doherty DA, Glass IA, Parisi MA, Phelps IG, et al. 2017. Molecular genetic findings and clinical correlations in 100 patients with Joubert syndrome and related disorders prospectively evaluated at a single center. *Genet Med* 19: 875-82
194. Vogel P, Gelfman CM, Issa T, Payne BJ, Hansen GM, et al. 2015. Nephronophthisis and retinal degeneration in *tmem218*<sup>-/-</sup> mice: a novel mouse model for Senior-Loken syndrome? *Vet Pathol* 52: 580-95
195. Wang B, Zhang Y, Dong H, Gong S, Wei B, et al. 2018. Loss of *Tctn3* causes neuronal apoptosis and neural tube defects in mice. *Cell Death Dis* 9: 520
196. Wang C, Li J, Meng Q, Wang B. 2017. Three *Tctn* proteins are functionally conserved in the regulation of neural tube patterning and *Gli3* processing but not ciliogenesis and Hedgehog signaling in the mouse. *Dev Biol* 430: 156-65
197. Wang L, De Solis AJ, Goffer Y, Birkenbach KE, Engle SE, et al. 2019. Ciliary gene *RPGRIP1L* is required for hypothalamic arcuate neuron development. *JCI Insight* 4
198. Wang W, Allard BA, Pottorf TS, Wang HH, Vivian JL, Tran PV. 2020. Genetic interaction of mammalian IFT-A paralogs regulates cilia disassembly, ciliary entry of membrane protein, Hedgehog signaling, and embryogenesis. *FASEB J* 34: 6369-81
199. Weatherbee SD, Niswander LA, Anderson KV. 2009. A mouse model for Meckel syndrome reveals *Mks1* is required for ciliogenesis and Hedgehog signaling. *Hum Mol Genet* 18: 4565-75
200. Weng RR, Yang TT, Huang CE, Chang CW, Wang WJ, Liao JC. 2018. Super-Resolution Imaging Reveals *TCTN2* Depletion-Induced IFT88 Lumen Leakage and Ciliary Weakening. *Biophys J* 115: 263-75
201. Wheway G, Schmidts M, Mans DA, Szymanska K, Nguyen TT, et al. 2015. An siRNA-based functional genomics screen for the identification of regulators of ciliogenesis and ciliopathy genes. *Nat Cell Biol* 17: 1074-87
202. Won J, Marin de Evsikova C, Smith RS, Hicks WL, Edwards MM, et al. 2011. *NPHP4* is necessary for normal photoreceptor ribbon synapse maintenance and outer segment formation, and for sperm development. *Hum Mol Genet* 20: 482-96
203. Wu C, Yang M, Li J, Wang C, Cao T, et al. 2014. *Talpid3*-binding centrosomal protein *Cep120* is required for centriole duplication and proliferation of cerebellar granule neuron progenitors. *PLoS One* 9: e107943
204. Yabut OR, Fernandez G, Huynh T, Yoon K, Pleasure SJ. 2015. Suppressor of Fused Is Critical for Maintenance of Neuronal Progenitor Identity during Corticogenesis. *Cell Rep* 12: 2021-34
205. Yamazoe T, Nagai T, Umeda S, Sugaya Y, Mizuno K. 2020. Roles of TOG and jelly-roll domains of centrosomal protein *CEP104* in its functions in cilium elongation and Hedgehog signaling. *J Biol Chem* 295: 14723-36
206. Yin WC, Satkunendran T, Mo R, Morrissy S, Zhang X, et al. 2019. Dual Regulatory Functions of *SUFU* and Targetome of *GLI2* in *SHH* Subgroup Medulloblastoma. *Dev Cell* 48: 167-83 e5
207. Yue Y, Engelke MF, Blasius TL, Verhey KJ. 2021. Hedgehog-induced ciliary trafficking of kinesin-4 motor *KIF7* requires intraflagellar transport but not *KIF7*'s microtubule binding. *Mol Biol Cell*: mbcE21040215
208. Zhang H, Li S, Doan T, Rieke F, Detwiler PB, et al. 2007. Deletion of *PrBP/delta* impedes transport of *GRK1* and *PDE6* catalytic subunits to photoreceptor outer segments. *Proc Natl Acad Sci U S A* 104: 8857-62
209. Zheng W, Zhang C, Hou D, Cao C. 2012. Comparison on different strategies for treatments of hypertensive hemorrhage in the basal ganglia region with a volume of 25 to 35 ml. *Acta Cir Bras* 27: 727-31
210. Zhulyn O, Hui CC. 2015. *Sufu* and *Kif7* in limb patterning and development. *Dev Dyn* 244: 468-78
